# Supplementary material
Source: PubMed Central journal article supplement (PMC5930120)

FIGURE E1. IFN-g release ELISpot assay results for tested patients.

A, Results for all patients with SCARs; each dot point represents a different drug concentration (size of the dot increases with drug concentration). B, Results for all control patients; each dot point represents a different drug concentration (size of the dot increases with drug concentration). C, Results from patients with SCARs who had >1 positive antibiotic (>50 SFU/million cells). All antibiotics tests for patients with SCARs (A), tolerant controls (B), and ELISpot assay positive only patients with SCARs (C) are demonstrated; the size of each dot is representative of the increasing drug concentration. Positive IFN-g ELISpot assays were those considered above the dotted line intersecting the y-axis at 50 SFU/million cells. AMP, Ampicillin; CEF, ceftriaxone; CEFZ, cefazolin; CIP, ciprofloxacin; FLU, flucloxacillin; 4NO, 4-nitro sulfamethoxazole; MER, meropenem; MET, metronidazole; PENG, penicillin G; PIP-TAZ, piperacillin-tazobactam; SMX, sulfamethoxazole; TEIC, teicoplanin; TMP, trimethoprim; TMP-SMX, trimethoprim-sulfamethoxazole; VAN, vancomycin.

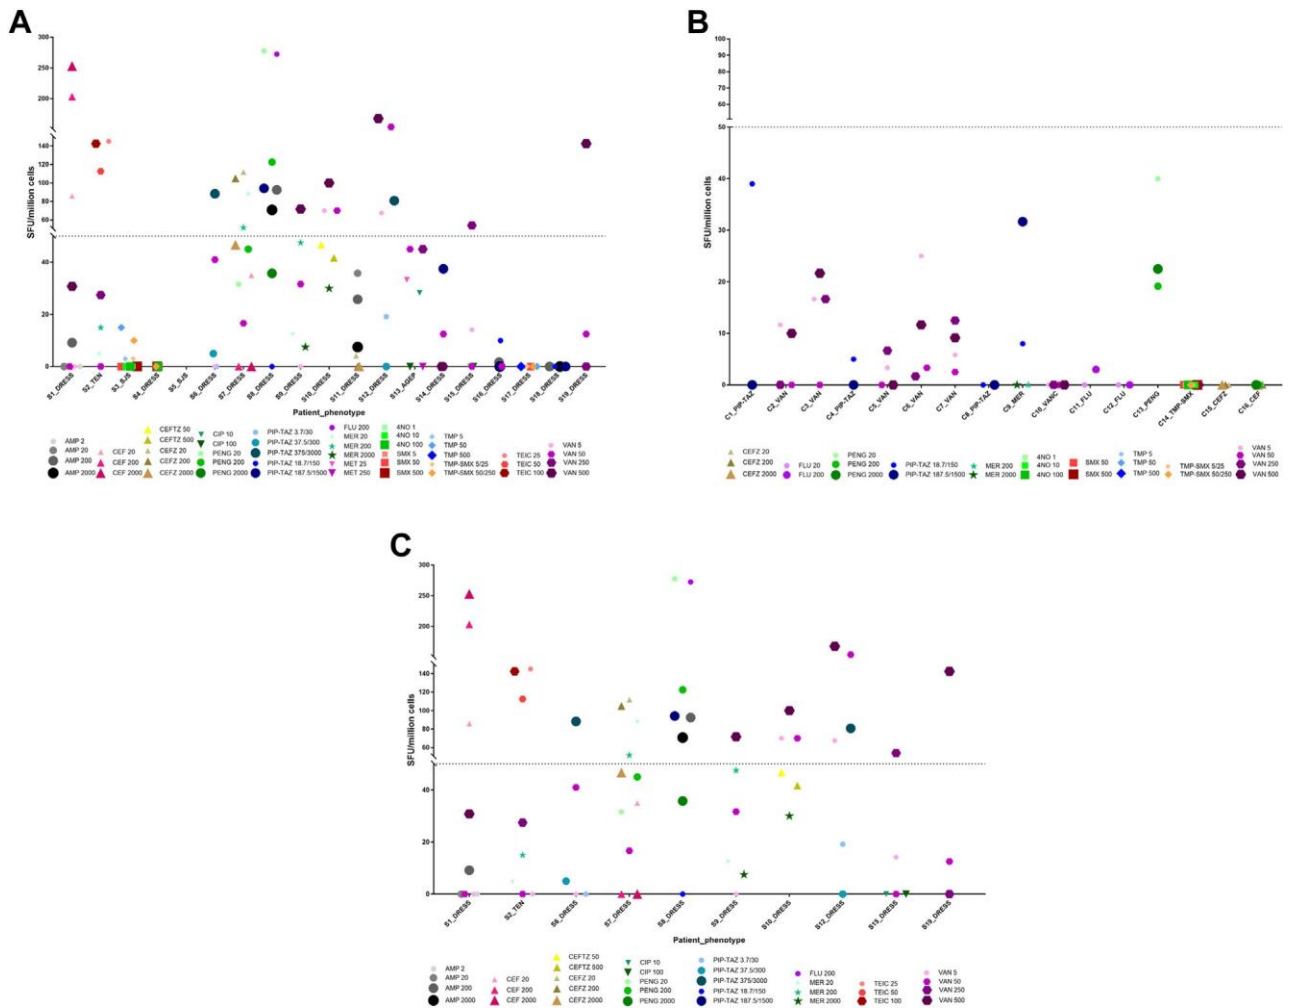

Supplement: NIHMS948392-supplement-supplement_1.pdf [file NIHMS948392-supplement-supplement_1.pdf]
